# Supplementary material for: Urinary glycoproteomic profiling of non-muscle invasive and muscle invasive bladder carcinoma patients reveals distinct N-glycosylation pattern of CD44, MGAM, and GINM1
Source: PubMed Central journal article supplement (PMC7456616; doi:10.18632/oncotarget.27696), 2020-08-25
Supplement: oncotarget-11-3244-s001.pdf [file oncotarget-11-3244-s001.pdf]

## Urinary glycoproteomic profiling of non-muscle invasive and muscle invasive bladder carcinoma patients reveals distinct N-glycosylation pattern of CD44, MGAM, and GINM1

### SUPPLEMENTARY MATERIALS

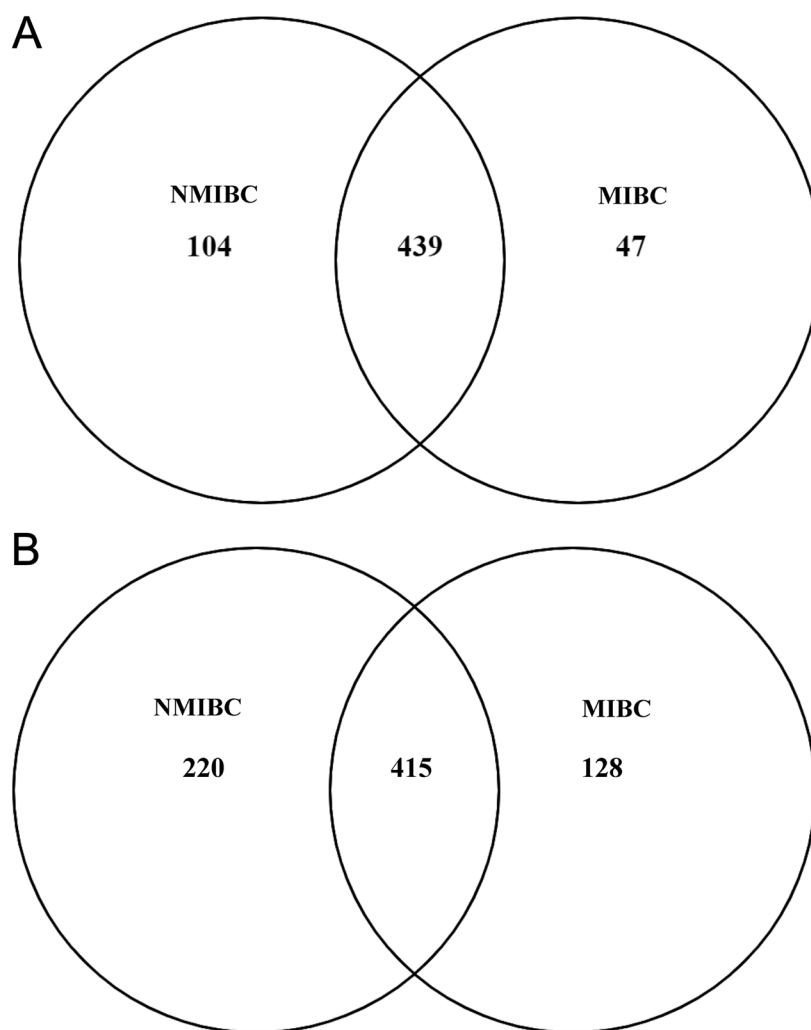

**Supplementary Figure 1:** (A) Mass spectrometric analysis of NMIBC ( $n = 5$ ) and MIBC ( $n = 4$ ) samples resulted in identification of 590 proteins. (B) SPEG based N-glycoproteomic analysis of NMIBC ( $n = 5$ ) and MIBC ( $n = 4$ ) samples resulted in identification of 763 N-glycopeptides.

**Supplementary Table 1: Overview of all the bladder cancer patients from which urine was obtained**

| <b>Patient Id</b> | <b>Age</b> | <b>Gender</b> | <b>Clinicopathological staging</b> |
|-------------------|------------|---------------|------------------------------------|
| T1_31             | 56         | Male          | T1                                 |
| T1_37             | 83         | Male          | T1                                 |
| T1_38             | 63         | Male          | T1                                 |
| T1_47             | 64         | Male          | T1                                 |
| T1_50             | 64         | Male          | T1                                 |
| T2_40             | 65         | Male          | T2                                 |
| T2_46             | 38         | Female        | T2                                 |
| T2_57             | 38         | Male          | T2                                 |
| T2_74             | 55         | Male          | T2                                 |

**Supplementary Table 2: Quantification of N-glycoproteomics of NMIBC patients and healthy cohort.** See Supplementary Table 2

**Supplementary Table 3: Total proteomics data for Non-muscle invasive bladder carcinoma patients and healthy cohorts.** See Supplementary Table 3

**Supplementary Table 4: Quantification of N-glycoproteomics of MIBC patients and healthy cohort.** See Supplementary Table 4

**Supplementary Table 5: Total proteomics data for-muscle invasive bladder carcinoma patients and healthy cohorts.** See Supplementary Table 5

**Supplementary Table 6: Commonly glycosylated peptides between NMIBC and MIBC with their fold change values.** See Supplementary Table 6

**Supplementary Table 7: Top 5 pathways enriched in NMIBC and MIBC patients.** See Supplementary Table 7
